# Supplementary material for: The effect of polarity and hydrogen bonding on the electronic and vibrational structure of the salicylate anion in acetonitrile and water: implicit and explicit solvation approaches
Source: Royal Society of Chemistry journal article supplement (doi:10.1039/d4ra04606d), 2024-01-01
Supplement: d4ra04606d1.pdf [file d4ra04606d1.pdf]

## ELECTRONIC SUPPLEMENTARY INFORMATION

### The Effect of Polarity and Hydrogen Bonding on the Electronic and Vibrational Structure of Salicylate Anion in Acetonitrile and Water: Implicit and Explicit Solvation Approaches

Siddharth Mall Bishen<sup>1,2</sup>, Meena Adhikari<sup>2</sup>, Sandeep Pokharia<sup>3</sup>, Hiridyesh Mishra<sup>2\*</sup>

<sup>1</sup>Department of Physics, Institute of Science, Banaras Hindu University, Varanasi 221005, India

<sup>2</sup>Physics Section, MMV, Department of Physics, Banaras Hindu University, Varanasi 221005, India.

<sup>3</sup>Chemistry section, MMV, Banaras Hindu University, Varanasi 221005, India.

**Table S1:** GS optimized properties of salicylate anion at different functionals in implicit ACN

|                   | B3LYP       |            | CAM-B3LYP  | M06-2X     | PBE0       |
|-------------------|-------------|------------|------------|------------|------------|
|                   | Without GD3 | With GD3   |            |            |            |
| Energy (Hartree)  | -495.75660  | -495.76679 | -495.53625 | -494.56030 | -495.23136 |
| Dipole Moment (D) | 9.887       | 9.907      | 9.982      | 9.731      | 9.318      |

**Table S2:** GS optimized coordinates of *enol* form of salicylate anion in implicit ACN at B3LYP/6-311++G(d,p) without GD3 correction.

| Tag | Symbol | NA | NB | NC | Bond     | Angle    | Dihedral | X        | Y        | Z        |
|-----|--------|----|----|----|----------|----------|----------|----------|----------|----------|
| 1   | C      | -  | -  | -  | -        | -        | -        | 2.578373 | -0.12692 | 0.000132 |
| 2   | C      | 1  | -  | -  | 1.390262 | -        | -        | 1.82109  | 1.038992 | -4E-06   |
| 3   | C      | 2  | 1  | -  | 1.403359 | 120.1752 | -        | 0.419442 | 0.969722 | -0.00013 |
| 4   | C      | 3  | 2  | 1  | 1.416101 | 119.9476 | 0        | -0.22606 | -0.2907  | -0.00013 |
| 5   | C      | 4  | 3  | 2  | 1.400084 | 118.5055 | 0        | 0.564461 | -1.44626 | 0.00001  |
| 6   | C      | 5  | 4  | 3  | 1.391687 | 121.6421 | 0        | 1.954564 | -1.37988 | 0.000139 |
| 7   | H      | 1  | 2  | 3  | 1.085316 | 119.4335 | -180     | 3.661582 | -0.05932 | 0.000232 |
| 8   | H      | 2  | 1  | 6  | 1.08488  | 120.9724 | -179.999 | 2.297063 | 2.013884 | -2.7E-05 |
| 9   | C      | 4  | 3  | 2  | 1.519606 | 120.7449 | 179.9937 | -1.74262 | -0.38682 | -0.00012 |
| 10  | H      | 5  | 4  | 3  | 1.084098 | 117.7971 | 179.9978 | 0.058405 | -2.405   | 0.00005  |
| 11  | H      | 6  | 5  | 4  | 1.08439  | 120.4161 | 179.9986 | 2.547546 | -2.28777 | 0.000266 |
| 12  | O      | 9  | 4  | 3  | 1.244692 | 119.0121 | 179.9877 | -2.27623 | -1.51133 | -0.00035 |
| 13  | O      | 9  | 4  | 3  | 1.283713 | 115.5454 | -0.04257 | -2.36835 | 0.734066 | 0.000737 |
| 14  | O      | 3  | 2  | 1  | 1.348126 | 119.1762 | -179.998 | -0.29507 | 2.112929 | -0.00032 |
| 15  | H      | 14 | 3  | 2  | 1.022229 | 103.2417 | 179.9952 | -1.26297 | 1.784111 | -0.00046 |
| 16  | -      | 4  | 3  | 2  | 0.368254 | 10.75135 | 0.100983 | 0        | 0        | 0        |

**Table S3:** GS optimized coordinates of keto form of salicylate anion in implicit ACN at B3LYP/6-311++G(d,p) without GD3 correction

| Tag | Symbol | NA | NB | NC | Bond     | Angle    | Dihedral | X        | Y        | Z        |
|-----|--------|----|----|----|----------|----------|----------|----------|----------|----------|
| 1   | C      | -  | -  | -  | -        | -        | -        | -2.57921 | -0.0964  | -7.3E-05 |
| 2   | C      | 1  | -  | -  | 1.384274 | -        | -        | -1.81698 | 1.059117 | 0.00005  |
| 3   | C      | 2  | 1  | -  | 1.424654 | 121.375  | -        | -0.39323 | 1.00851  | -6.1E-05 |
| 4   | C      | 3  | 2  | 1  | 1.437769 | 116.868  | -0.00398 | 0.210586 | -0.29632 | -0.00022 |
| 5   | C      | 4  | 3  | 2  | 1.403275 | 120.3511 | 0.000344 | -0.59062 | -1.44839 | -0.00026 |
| 6   | C      | 5  | 4  | 3  | 1.387259 | 121.4623 | 0.003745 | -1.9755  | -1.36722 | -0.00024 |
| 7   | H      | 1  | 2  | 3  | 1.086254 | 119.2735 | -179.999 | -3.66264 | -0.01803 | 0.000003 |
| 8   | H      | 2  | 1  | 6  | 1.085625 | 120.7068 | -179.996 | -2.29089 | 2.035844 | 0.00024  |
| 9   | C      | 4  | 3  | 2  | 1.48559  | 119.794  | -179.987 | 1.690609 | -0.42481 | -3.8E-05 |
| 10  | H      | 5  | 4  | 3  | 1.084821 | 118.1133 | -179.996 | -0.09693 | -2.41437 | -0.00032 |
| 11  | H      | 6  | 5  | 4  | 1.084026 | 120.7099 | 179.9989 | -2.58268 | -2.26524 | -0.00029 |
| 12  | O      | 9  | 4  | 3  | 1.227863 | 123.8276 | 179.9545 | 2.283375 | -1.50011 | 0.000657 |
| 13  | O      | 9  | 4  | 3  | 1.332215 | 114.8966 | -0.01001 | 2.35386  | 0.730566 | 0.000053 |
| 14  | O      | 3  | 2  | 1  | 1.301864 | 121.7701 | 179.9957 | 0.331104 | 2.090266 | -2.9E-05 |
| 15  | H      | 13 | 9  | 4  | 1.060749 | 105.7985 | -0.00205 | 1.612444 | 1.489177 | -6.7E-05 |
| 16  | -      | 4  | 3  | 2  | 0.363531 | 10.56763 | -0.15131 | 0        | 0        | 0        |

**Table S4:** GS optimized coordinates of *enol* form of salicylate anion in implicit H<sub>2</sub>O at B3LYP/6-311++G(d,p) without GD3 correction

| Tag | Symbol | NA | NB | NC | Bond     | Angle    | Dihedral | X        | Y        | Z        |
|-----|--------|----|----|----|----------|----------|----------|----------|----------|----------|
| 1   | C      | -  | -  | -  | -        | -        | -        | 2.576449 | -0.13529 | -0.00011 |
| 2   | C      | 1  | -  | -  | 1.389111 | -        | -        | 1.823773 | 1.032236 | -0.0002  |
| 3   | C      | 2  | 1  | -  | 1.399622 | 120.0258 | -        | 0.425802 | 0.964276 | 0.000102 |
| 4   | C      | 3  | 2  | 1  | 1.41328  | 120.3457 | -0.01764 | -0.22815 | -0.28861 | 0.000123 |
| 5   | C      | 4  | 3  | 2  | 1.402154 | 118.2603 | 0.015827 | 0.559518 | -1.44861 | 0.000177 |
| 6   | C      | 5  | 4  | 3  | 1.38951  | 121.5604 | -0.00472 | 1.947579 | -1.38518 | 0.000112 |
| 7   | H      | 1  | 2  | 3  | 1.084544 | 119.4271 | -179.998 | 3.659104 | -0.07131 | -0.00031 |
| 8   | H      | 2  | 1  | 6  | 1.084104 | 121.087  | -179.994 | 2.30078  | 2.005758 | -0.00047 |
| 9   | C      | 4  | 3  | 2  | 1.508026 | 121.0681 | -179.979 | -1.73335 | -0.38081 | -0.00002 |
| 10  | H      | 5  | 4  | 3  | 1.083228 | 118.3091 | 179.9942 | 0.059108 | -2.40933 | 0.00029  |
| 11  | H      | 6  | 5  | 4  | 1.083616 | 120.3015 | 179.9967 | 2.536461 | -2.29481 | 0.000209 |
| 12  | O      | 9  | 4  | 3  | 1.255629 | 119.3963 | 179.9859 | -2.28163 | -1.51041 | -0.00027 |
| 13  | O      | 9  | 4  | 3  | 1.283753 | 116.748  | -0.01085 | -2.38014 | 0.7281   | 0.000057 |
| 14  | O      | 3  | 2  | 1  | 1.363853 | 118.4304 | 179.9964 | -0.28099 | 2.1307   | 0.000079 |
| 15  | H      | 14 | 3  | 2  | 1.006721 | 104.1001 | 179.9937 | -1.24313 | 1.834458 | 0.000216 |
| 16  | -      | 4  | 3  | 2  | 0.367891 | 10.76438 | -0.08431 | 0        | 0        | 0        |

**Table S5:** GS optimized coordinates of *keto* form of salicylate anion in implicit H<sub>2</sub>O at B3LYP/6-311++G(d,p) without GD3 correction

| Tag | Symbol | NA | NB | NC | Bond     | Angle    | Dihedral | X        | Y        | Z        |
|-----|--------|----|----|----|----------|----------|----------|----------|----------|----------|
| 1   | C      | -  | -  | -  | -        | -        | -        | 2.57719  | -0.0873  | 0.00009  |
| 2   | C      | 1  | -  | -  | 1.384264 | -        | -        | 1.809354 | 1.064485 | -0.0001  |
| 3   | C      | 2  | 1  | -  | 1.41774  | 121.0466 | -        | 0.393122 | 0.999117 | -7.9E-05 |
| 4   | C      | 3  | 2  | 1  | 1.432065 | 117.459  | -0.00477 | -0.20793 | -0.30071 | 0.000044 |
| 5   | C      | 4  | 3  | 2  | 1.404957 | 120.1965 | 0.004025 | 0.597662 | -1.45176 | 0.000222 |
| 6   | C      | 5  | 4  | 3  | 1.385168 | 121.1836 | -0.00075 | 1.979779 | -1.35987 | 0.000267 |
| 7   | H      | 1  | 2  | 3  | 1.085391 | 119.246  | -179.999 | 3.659319 | -0.00321 | 0.00009  |
| 8   | H      | 2  | 1  | 6  | 1.084784 | 120.7661 | -179.999 | 2.277127 | 2.043231 | -0.00026 |
| 9   | C      | 4  | 3  | 2  | 1.476539 | 119.6842 | -179.996 | -1.67914 | -0.426   | -1.3E-05 |
| 10  | H      | 5  | 4  | 3  | 1.084115 | 118.5532 | 179.9986 | 0.114617 | -2.42231 | 0.000335 |
| 11  | H      | 6  | 5  | 4  | 1.083421 | 120.6007 | 179.9997 | 2.591944 | -2.25377 | 0.000409 |
| 12  | O      | 9  | 4  | 3  | 1.235679 | 124.1801 | -180     | -2.28409 | -1.50347 | 0.000085 |
| 13  | O      | 9  | 4  | 3  | 1.334358 | 115.393  | -0.00346 | -2.35158 | 0.726534 | -0.00011 |
| 14  | O      | 3  | 2  | 1  | 1.318864 | 121.4646 | -179.994 | -0.34642 | 2.091122 | -0.00038 |
| 15  | H      | 13 | 9  | 4  | 1.07031  | 105.6174 | -0.01086 | -1.60644 | 1.494869 | 0.000076 |
| 16  | -      | 4  | 3  | 2  | 0.365596 | 9.846425 | -0.01348 | 0        | 0        | 0        |

**Table S6:** ES optimized coordinates of *keto* form of salicylate anion in implicit ACN

| Tag | Symbol | NA | NB | NC | Bond     | Angle    | Dihedral | X        | Y        | Z        |
|-----|--------|----|----|----|----------|----------|----------|----------|----------|----------|
| 1   | C      | -  | -  | -  | -        | -        | -        | 2.638501 | -0.15374 | 0.000926 |
| 2   | C      | 1  | -  | -  | 1.420987 | -        | -        | 1.87067  | 1.041933 | 0.000873 |
| 3   | C      | 2  | 1  | -  | 1.420231 | 121.4054 | -        | 0.450806 | 1.009659 | -0.00025 |
| 4   | C      | 3  | 2  | 1  | 1.473691 | 119.851  | 0.051338 | -0.25348 | -0.28485 | -0.00025 |
| 5   | C      | 4  | 3  | 2  | 1.408648 | 116.9636 | -0.09206 | 0.544131 | -1.44592 | -0.00112 |
| 6   | C      | 1  | 2  | 3  | 1.391897 | 118.4105 | 0.007037 | 1.966205 | -1.37251 | -0.00031 |
| 7   | H      | 1  | 6  | 5  | 1.083353 | 120.898  | 179.9913 | 3.721183 | -0.11563 | 0.001671 |
| 8   | H      | 2  | 1  | 6  | 1.085014 | 121.3581 | -179.952 | 2.345192 | 2.017681 | 0.001033 |
| 9   | C      | 4  | 3  | 2  | 1.457428 | 123.021  | 179.9364 | -1.70647 | -0.39849 | -6E-06   |
| 10  | H      | 5  | 4  | 3  | 1.082779 | 118.982  | -179.946 | 0.060482 | -2.41468 | -0.00203 |
| 11  | H      | 6  | 1  | 2  | 1.085419 | 119.7769 | 179.978  | 2.530766 | -2.29955 | -0.00066 |
| 12  | O      | 9  | 4  | 3  | 1.244323 | 123.3807 | -179.967 | -2.308   | -1.48776 | 0.000595 |
| 13  | O      | 9  | 4  | 3  | 1.372067 | 118.3272 | -0.02853 | -2.44972 | 0.754836 | 0.000831 |
| 14  | O      | 3  | 2  | 1  | 1.286412 | 120.7776 | -179.95  | -0.23241 | 2.099648 | -0.00125 |
| 15  | H      | 13 | 9  | 4  | 0.990831 | 106.1319 | 0.106812 | -1.79878 | 1.501845 | -0.00064 |
| 16  | -      | 4  | 3  | 2  | 0.381301 | 13.11699 | 0.112361 | 0        | 0        | 0        |

**Table S7:** ES optimized coordinates of keto form of salicylate anion in implicit H<sub>2</sub>O at B3LYP/6-311++G(d,p) without GD3 correction

| Tag | Symbol | NA | NB | NC | Bond     | Angle    | Dihedral | X        | Y        | Z        |
|-----|--------|----|----|----|----------|----------|----------|----------|----------|----------|
| 1   | C      | -  | -  | -  | -        | -        | -        | 2.638868 | -0.15463 | -0.00069 |
| 2   | C      | 1  | -  | -  | 1.413228 | -        | -        | 1.87397  | 1.033705 | -0.00046 |
| 3   | C      | 2  | 1  | -  | 1.420006 | 121.7469 | -        | 0.45419  | 1.008394 | 0.000178 |
| 4   | C      | 3  | 2  | 1  | 1.478363 | 119.6492 | -0.0183  | -0.25412 | -0.28924 | 0.000199 |
| 5   | C      | 4  | 3  | 2  | 1.402934 | 116.7185 | 0.055448 | 0.543608 | -1.4433  | 0.000785 |
| 6   | C      | 1  | 2  | 3  | 1.392888 | 118.3062 | -0.01402 | 1.965165 | -1.37376 | 0.000015 |
| 7   | H      | 1  | 6  | 5  | 1.082556 | 120.9622 | 179.998  | 3.72074  | -0.11616 | -0.00124 |
| 8   | H      | 2  | 1  | 6  | 1.084652 | 121.1763 | 179.9624 | 2.350394 | 2.008123 | -0.00038 |
| 9   | C      | 4  | 3  | 2  | 1.444714 | 122.9072 | -179.951 | -1.69481 | -0.39704 | -0.00022 |
| 10  | H      | 5  | 4  | 3  | 1.082722 | 119.2838 | 179.9515 | 0.067913 | -2.41593 | 0.001622 |
| 11  | H      | 6  | 1  | 2  | 1.08442  | 119.9432 | -179.992 | 2.52581  | -2.302   | -1.9E-05 |
| 12  | O      | 9  | 4  | 3  | 1.260753 | 124.157  | -179.989 | -2.32285 | -1.49023 | -4E-06   |
| 13  | O      | 9  | 4  | 3  | 1.385657 | 118.9348 | 0.010512 | -2.45383 | 0.762238 | -0.00088 |
| 14  | O      | 3  | 2  | 1  | 1.289274 | 120.7993 | 179.9625 | -0.2256  | 2.103893 | 0.001109 |
| 15  | H      | 13 | 9  | 4  | 0.991137 | 106.1154 | -0.01613 | -1.8079  | 1.513986 | -0.00068 |
| 16  | -      | 4  | 3  | 2  | 0.385016 | 12.67415 | -0.10229 | 0        | 0        | 0        |

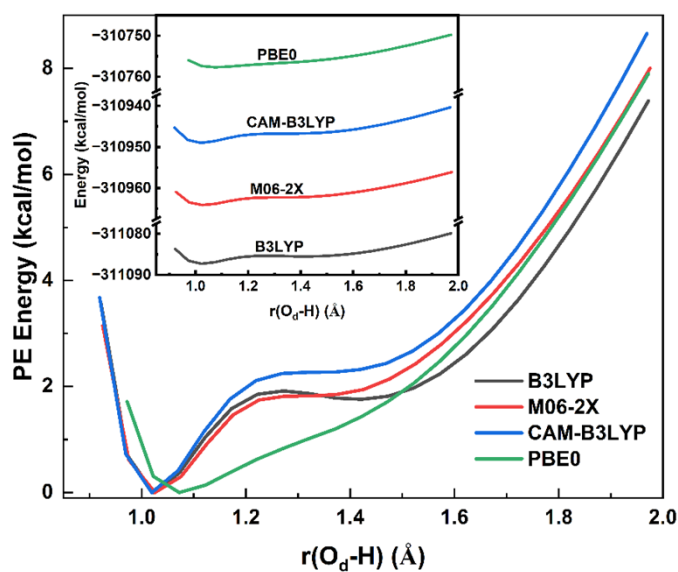

**Fig. S1:** GS IPT curve of Salicylate anion in implicit ACN computed at different basis sets.

**Table S8:** Comparison between different basis sets for Salicylate anion in implicit ACN

| Transition                | Species        | B3LYP              | CAM-B3LYP          | M06-2X             | PBE                | Experimental |
|---------------------------|----------------|--------------------|--------------------|--------------------|--------------------|--------------|
| Absorption<br>(nm)<br>(f) | A              | 275.35<br>(0.1167) | 260.3<br>(0.1273)  | 257.14<br>(0.1299) | 306.47<br>(0.1071) | 296          |
|                           | A <sub>T</sub> | 318.89<br>(0.1503) | 293.37<br>(0.1695) | 287.07<br>(0.1697) | -                  | ~330         |
| Emission<br>(nm) (f)      | A <sub>T</sub> | 379.07<br>(0.2345) | 354.53<br>(0.2853) | 354.48<br>(0.2907) | 425.52<br>(0.1858) | 392          |

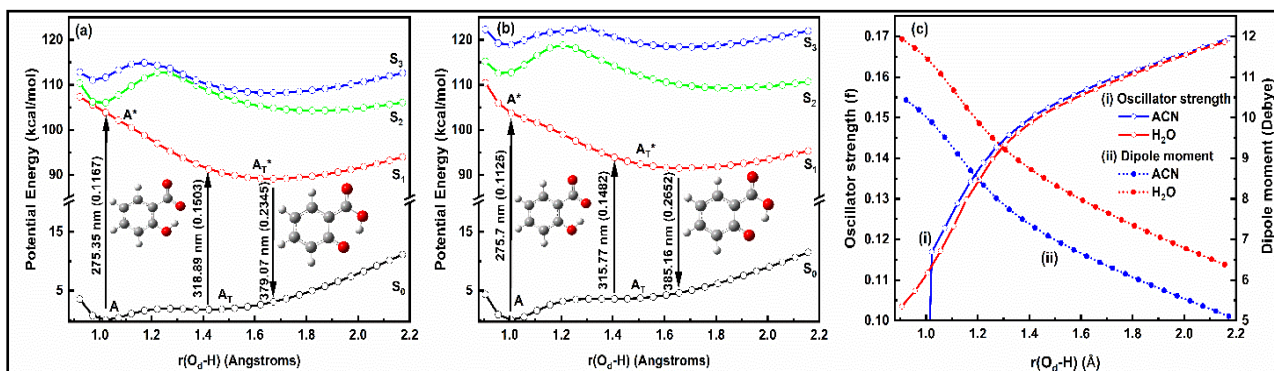

**Fig. S2:** PE curves of Salicylate anion in (a) ACN and (b) water; (c) Variation in (i) oscillator strength and (ii) transient dipole moment of salicylate anion in ACN and water with proton transfer for first singlet transition.

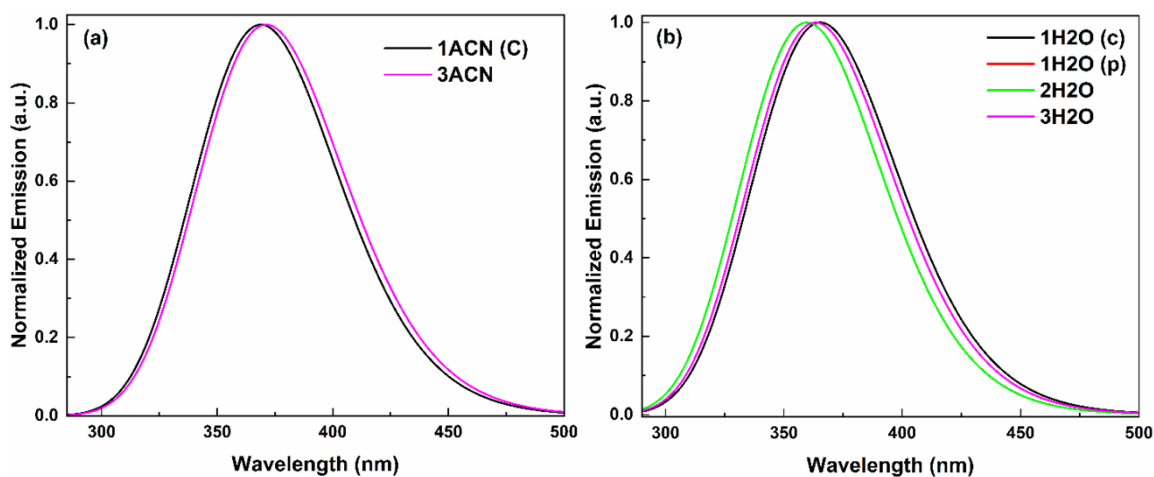

**Fig. S3:** Normalized emission of salicylate anion explicitly solvated with (a) ACN (b) water molecules.

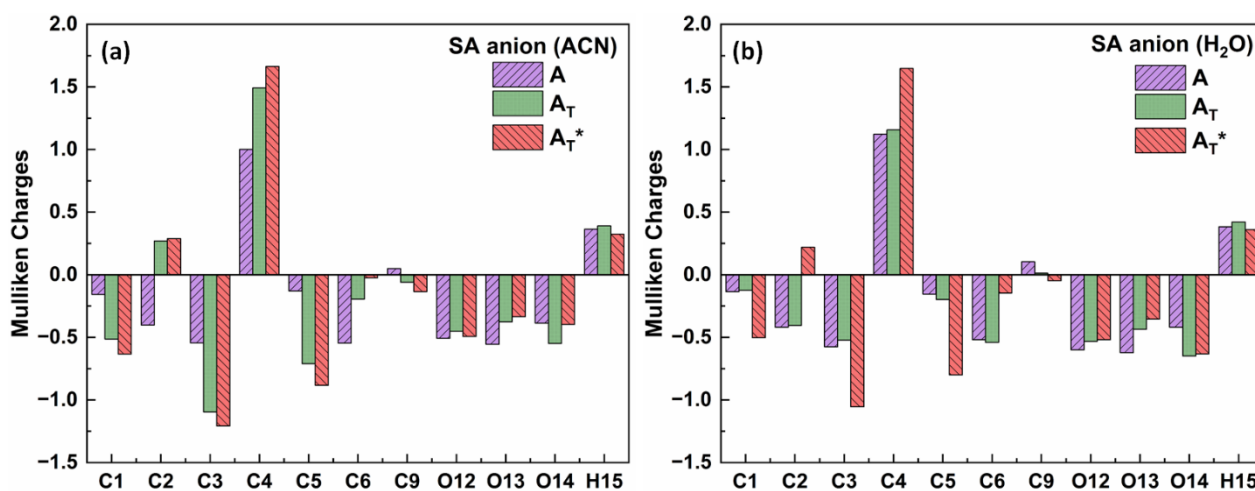

**Fig. S4:** Mulliken charge analysis of salicylate anion in implicit (a) ACN (b) water environment.

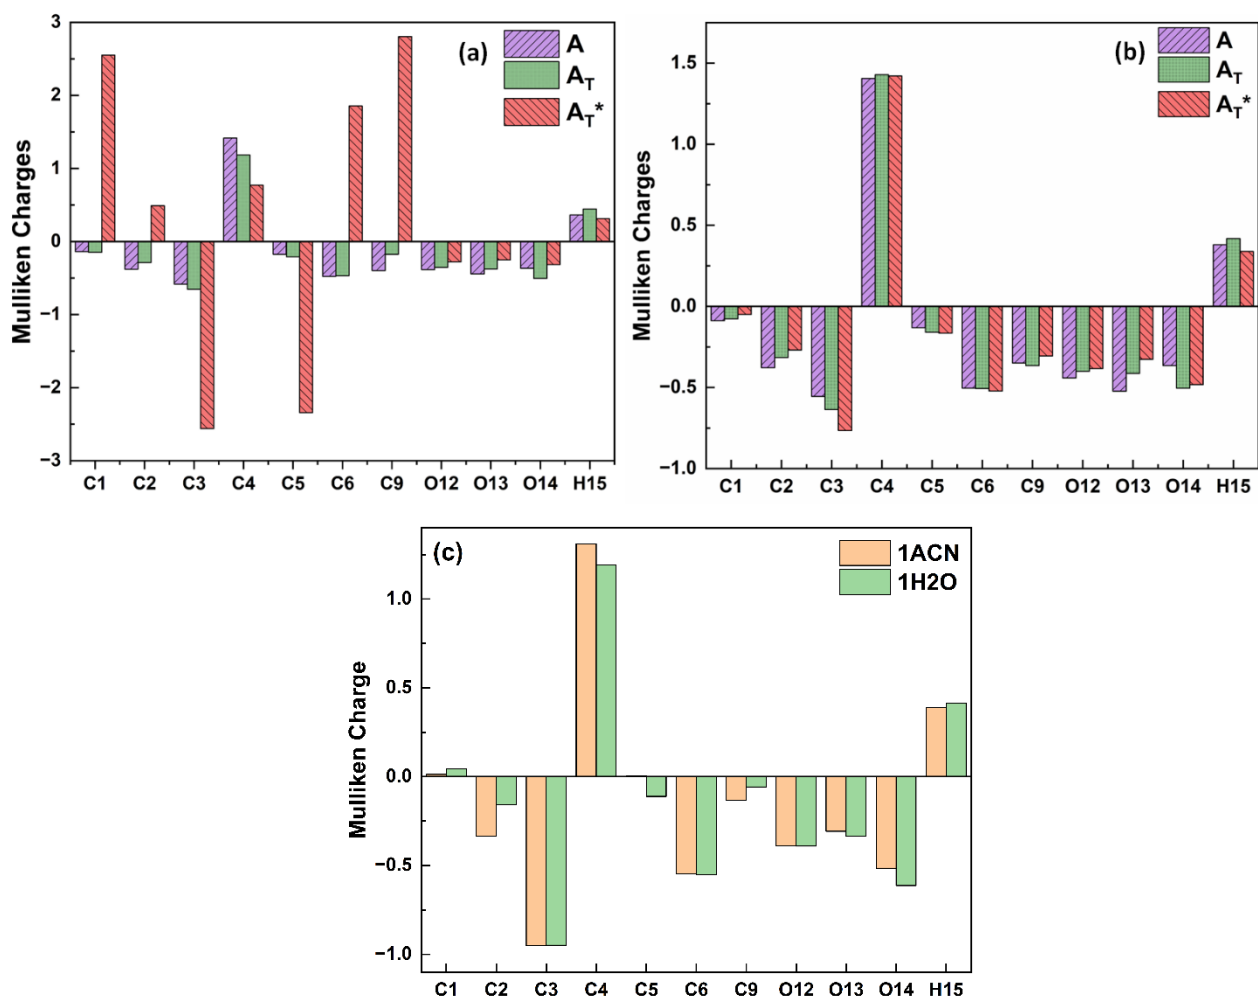

**Fig. S5:** Mulliken charge analysis of salicylate anion explicitly solvated with single (a) ACN (b) water molecule placed near the carboxylate position, (c) solvent molecule placed near the phenolic position.

**Table S9:** Hyperconjugative stabilization energies ( $\Delta E_{ij}^{(2)}$ ) for selected NBO pairs from second-order perturbation theory analysis of the Fock matrix in the NBO analysis for the salicylate anion moiety.

| SA anion Species    | Donor NBO (i)<br>(LP) | Acceptor NBO (j)<br>( $\sigma^*$ ) | $\Delta E_{ij}^{(2)}$ (kcal/mol) |       |
|---------------------|-----------------------|------------------------------------|----------------------------------|-------|
|                     |                       |                                    | ACN                              | Water |
| <i>Enol</i>         | LP1(O12)              | $\sigma^*(C4-C9)$                  | 2.02                             | 1.98  |
|                     |                       | $\sigma^*(C9-O13)$                 | 1.99                             | 1.57  |
|                     | LP2(O12)              | $\sigma^*(C3-C4)$                  | 0.56                             | 0.51  |
|                     |                       | $\sigma^*(C4-C9)$                  | 16.81                            | 15.06 |
|                     |                       | $\sigma^*(C4-O13)$                 | 21.72                            | 20.88 |
|                     |                       | $\sigma^*(O14-H15)$                | 5.32                             | 4.31  |
|                     | LP1(O13)              | $\sigma^*(C4-C9)$                  | 4.80                             | 4.44  |
|                     |                       | $\sigma^*(C4-C9)$                  | 6.92                             | 7.32  |
|                     | LP2(O13)              | $\sigma^*(C9-O12)$                 | 16.53                            | 17.46 |
|                     |                       | $\sigma^*(O14-H15)$                | 45.79                            | 34.30 |
| LP1(O14)            | $\sigma^*(C3-C4)$     | 6.33                               | 6.04                             |       |
| <i>Keto</i>         | LP1(O12)              | $\sigma^*(C4-C9)$                  | 2.38                             | 2.32  |
|                     |                       | $\sigma^*(C9-O13)$                 | 1.16                             | 1.02  |
|                     | LP2(O12)              | $\sigma^*(C4-C9)$                  | 15.88                            | 14.72 |
|                     |                       | $\sigma^*(C9-O13)$                 | 27.25                            | 26.06 |
|                     | LP1(O13)              | $\sigma^*(C4-C9)$                  | 5.32                             | 5.23  |
|                     |                       | $\sigma^*(C9-O12)$                 | 1.23                             | 1.29  |
|                     | LP(1)O14              | $\sigma^*(C3-C4)$                  | 5.99                             | 5.81  |
|                     |                       | $\sigma^*(O13-H15)$                | 5.73                             | 5.70  |
|                     | LP2(O14)              | $\sigma^*(C2-C3)$                  | 11.36                            | 10.01 |
|                     |                       | $\sigma^*(C3-C4)$                  | 5.56                             | 4.68  |
| $\sigma^*(O13-H15)$ |                       | 69.94                              | 76.02                            |       |

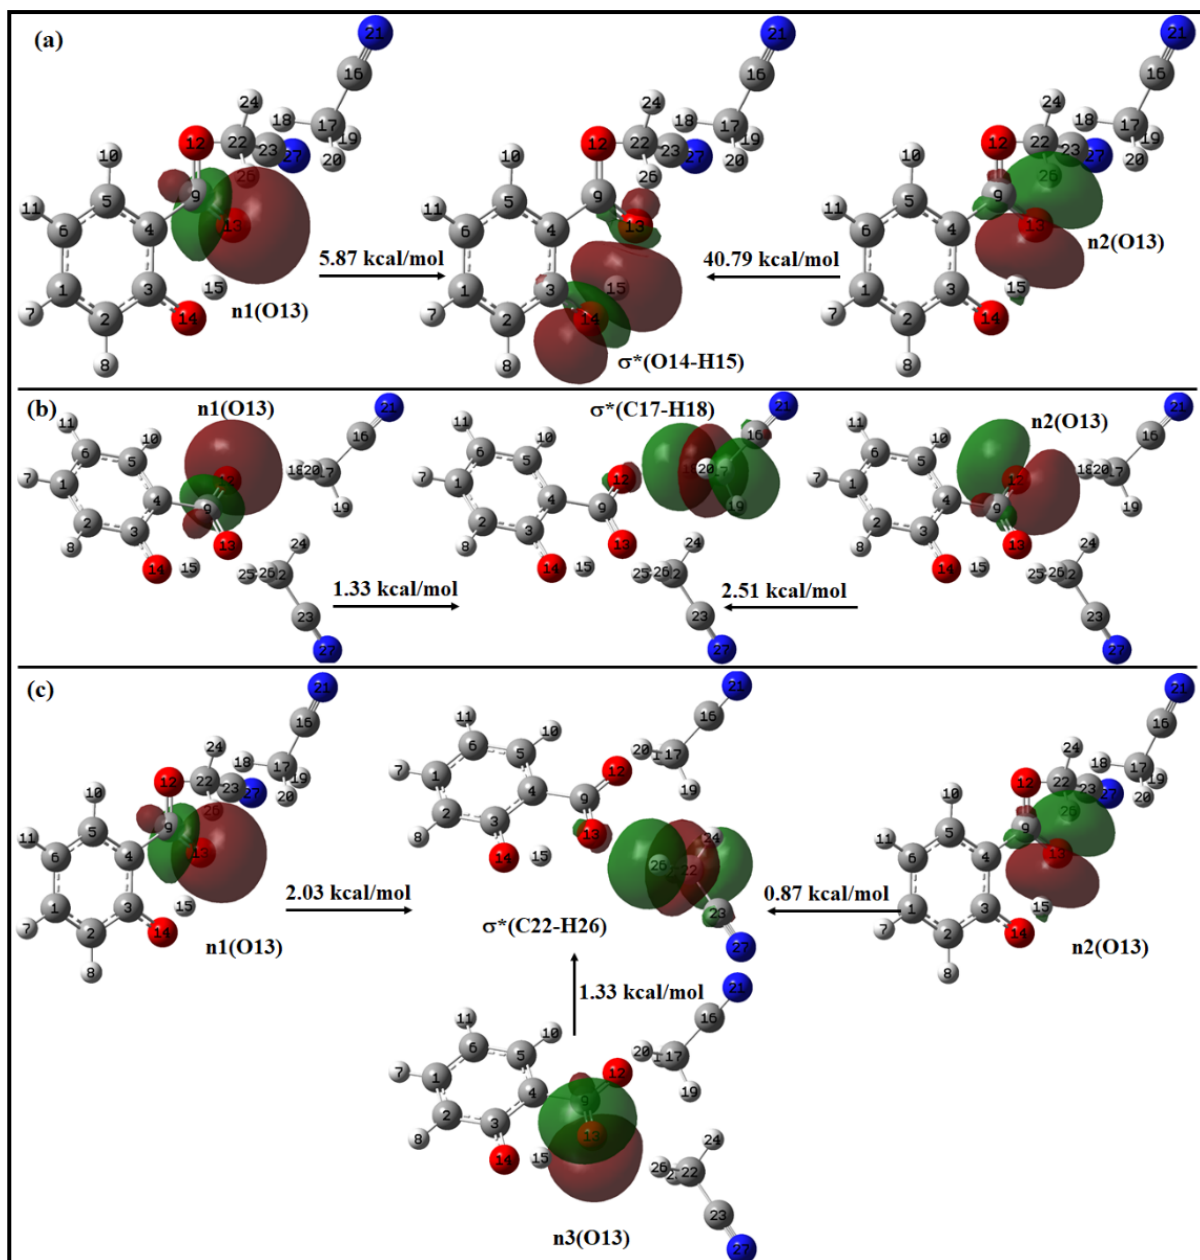

**Fig. S6:** Delocalization of charge from the lone pair orbital ( $n$ ) to  $\sigma^*$  molecular orbital: (a) within SA anion's enol form; between SA anion and (b) first ACN molecule (c) second ACN molecule, both situated near carboxylate group



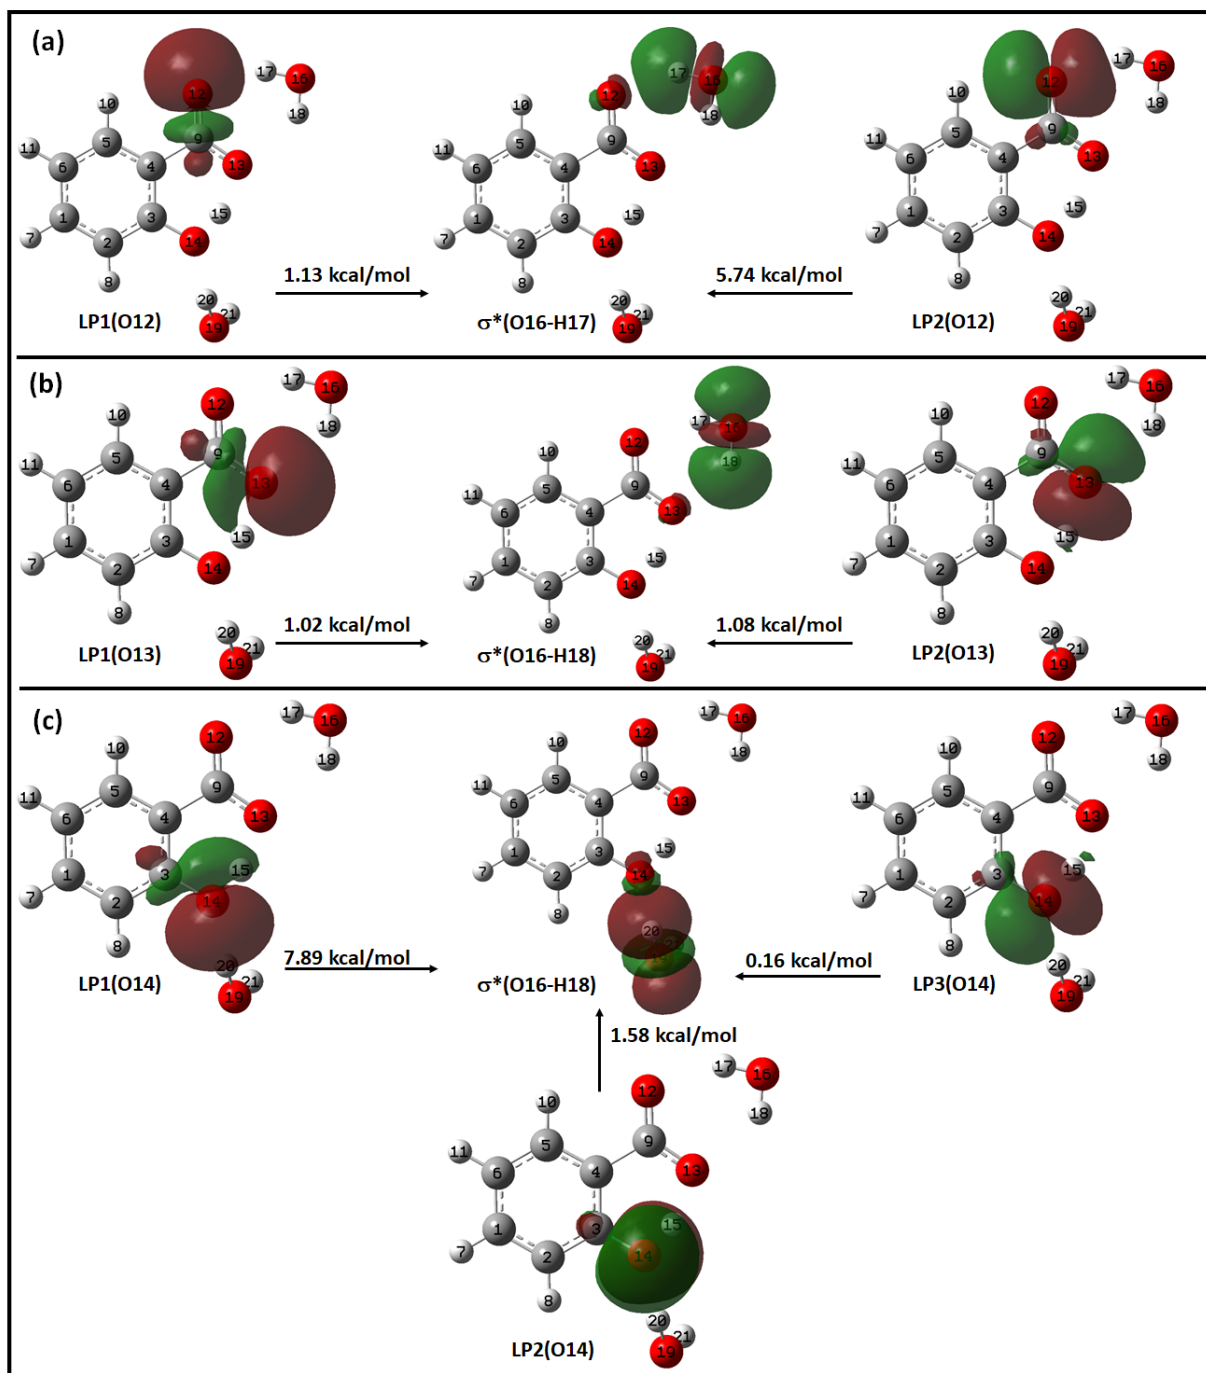

**Fig. S7:** Charge delocalization from the lone pair orbital (n) of oxygen atoms of SA anion's enol form to  $\sigma^*$  molecular orbital of water molecule: (a)  $n(\text{O12}) \rightarrow \sigma(\text{O16-H17})$  (b)  $n(\text{O13}) \rightarrow \sigma(\text{O16-H18})$ , and (c)  $n(\text{O13}) \rightarrow \sigma(\text{O16-H18})$  interactions.

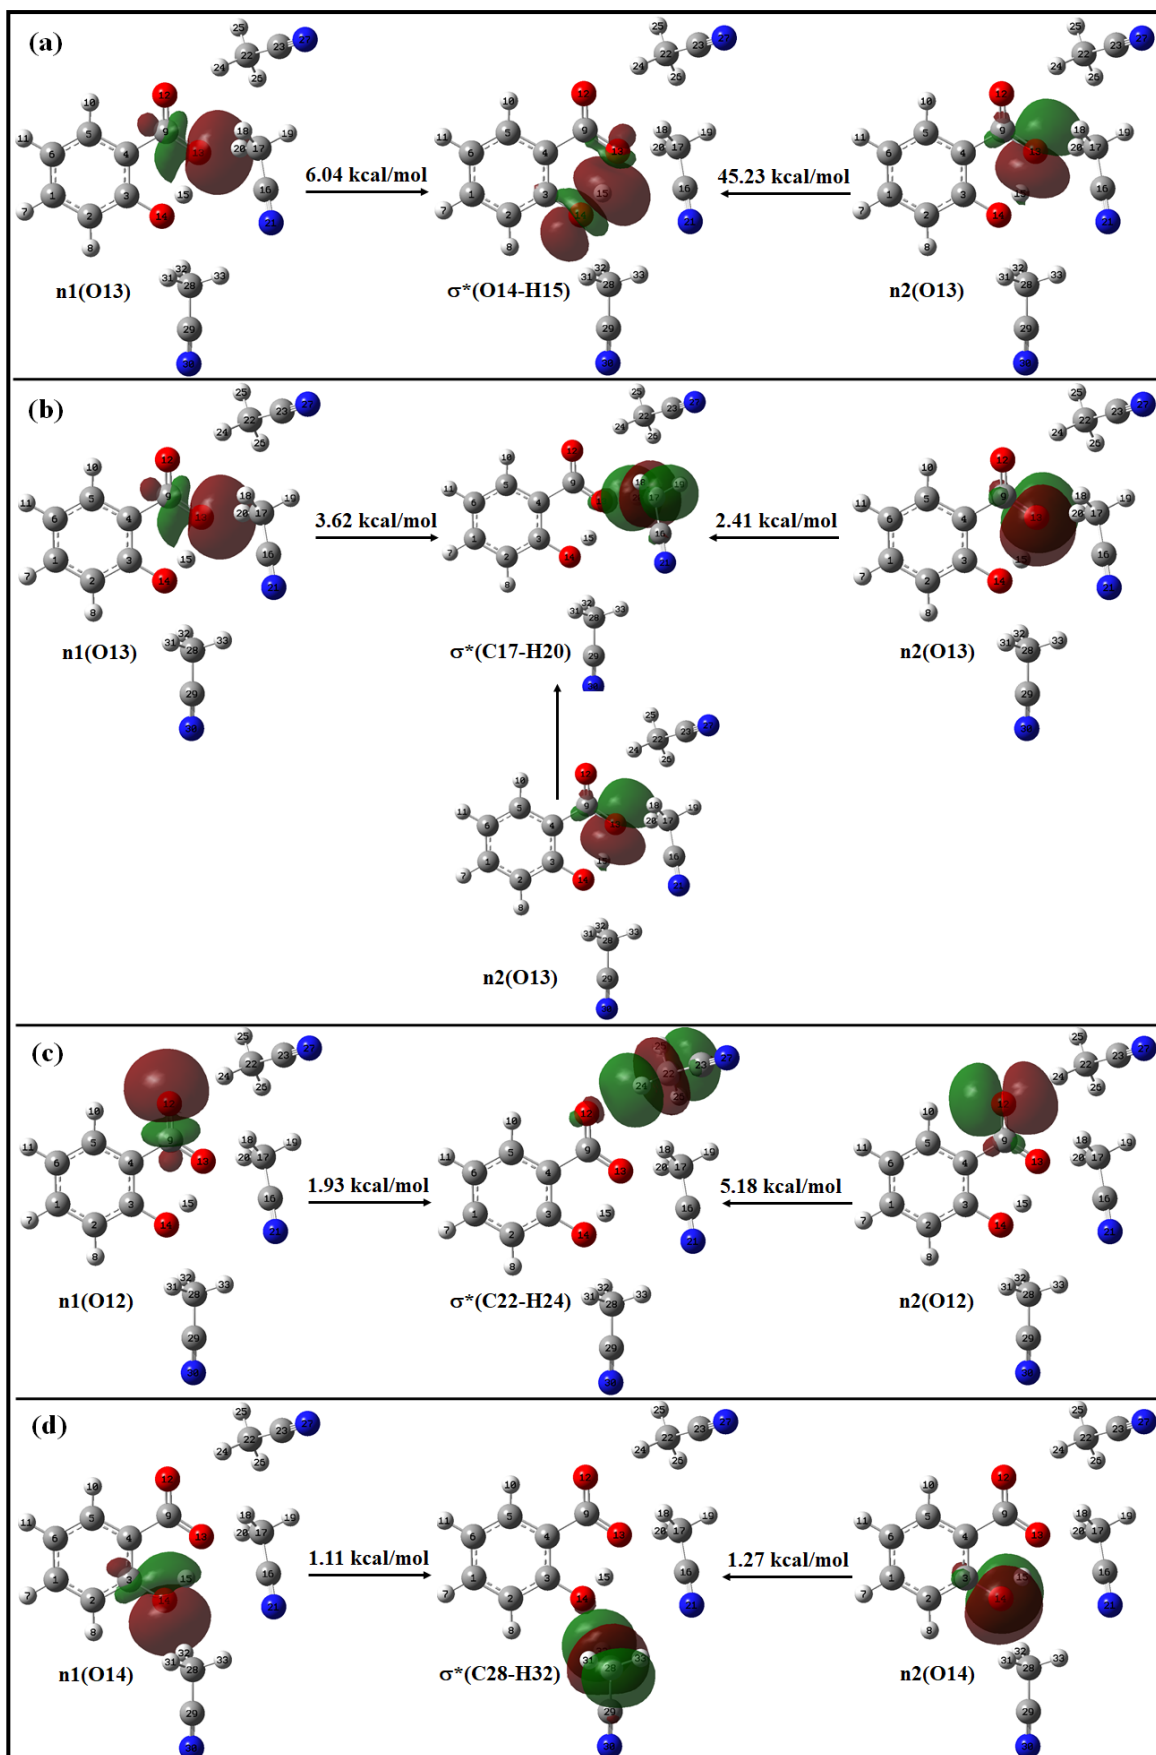

**Fig. S8:** Delocalization of charge from the lone pair orbital ( $n$ ) to  $\sigma^*$  molecular orbital: (a) within SA anion's enol form; between SA anion and (b) first ACN molecule (b) second ACN molecule, both situated near carboxylate group, and (d) third ACN molecule near the phenolic position.

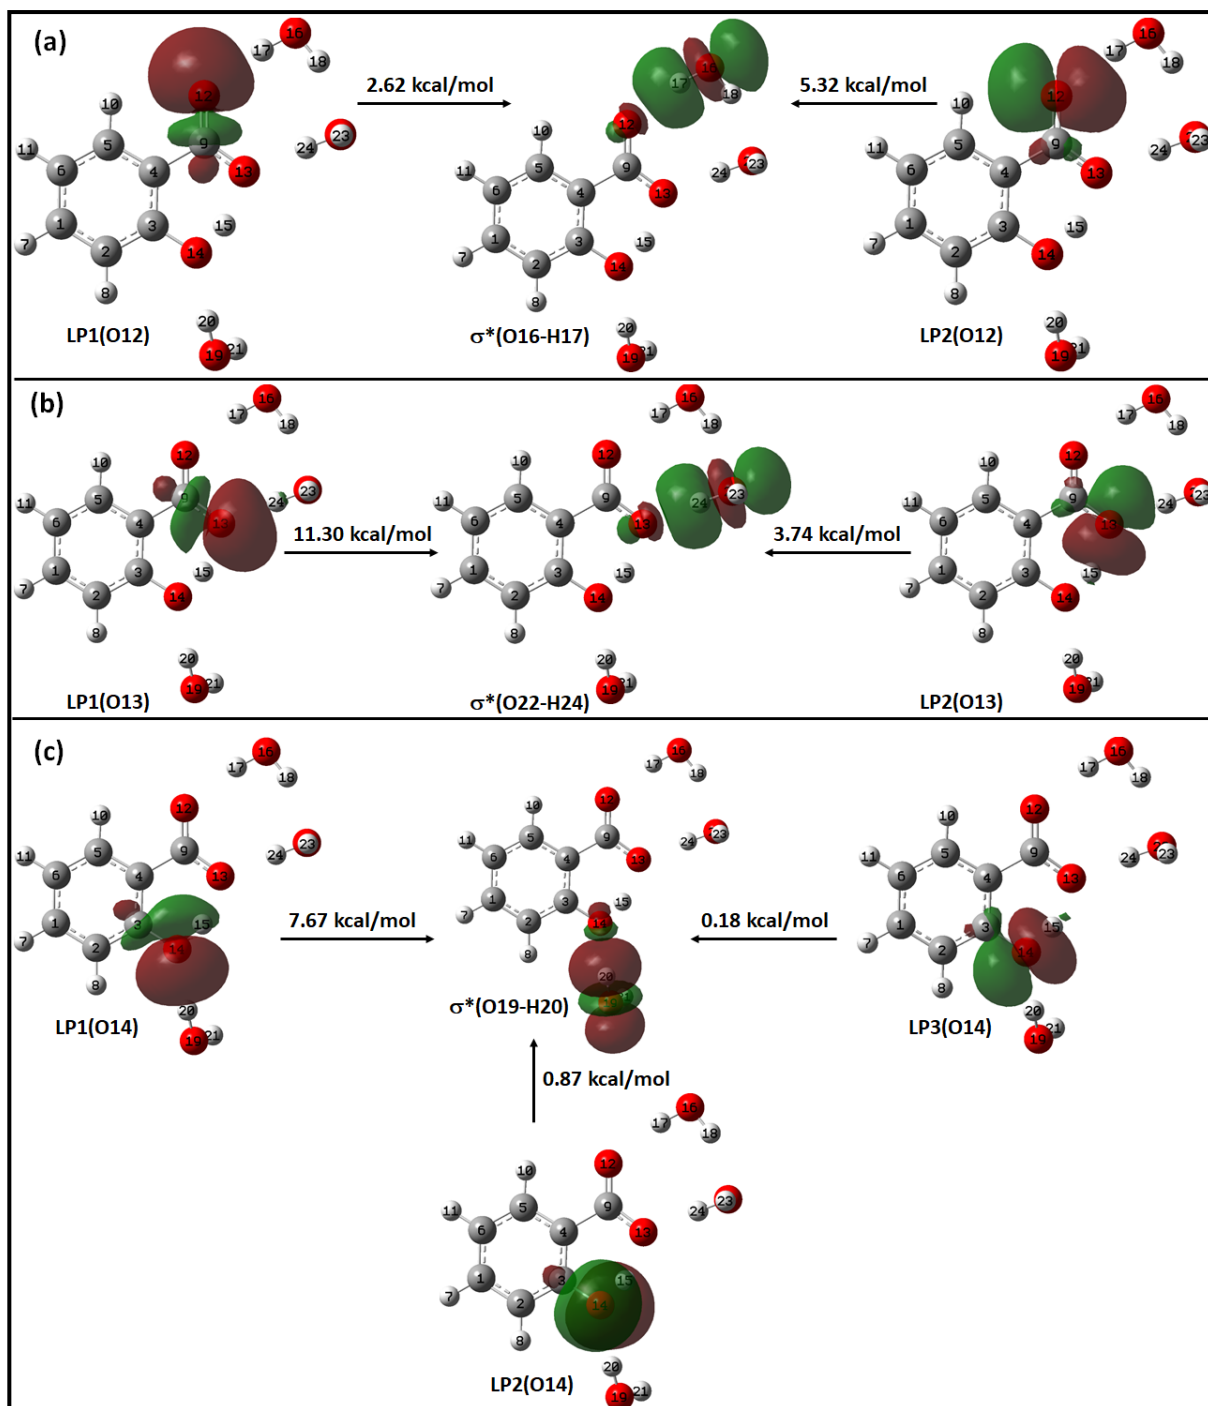

**Fig. S9:** Delocalization of charge from the lone pair orbital ( $n$ ) of oxygen atoms of SA anion's enol form to  $\sigma^*$  molecular orbital of: (a) water molecule near O12 atom (b) water molecule near O13 atom, at carboxylate positions, and (d) third water molecule near the phenolic oxygen O14 atom.

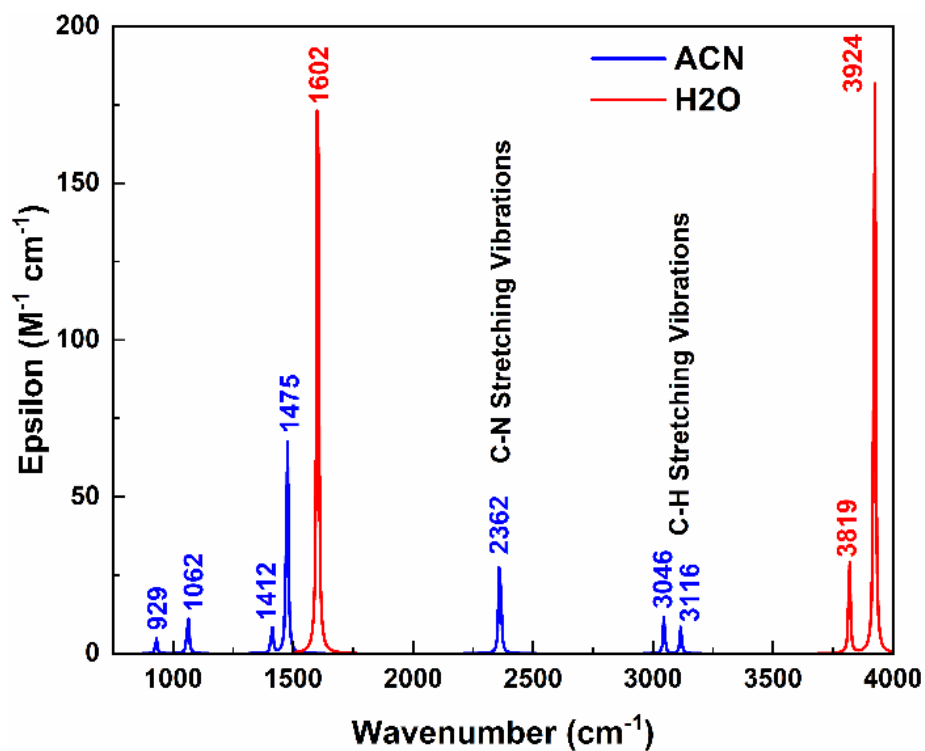

**Fig. S10:** Computational IR spectra of a single molecule of ACN and water in the ground state.

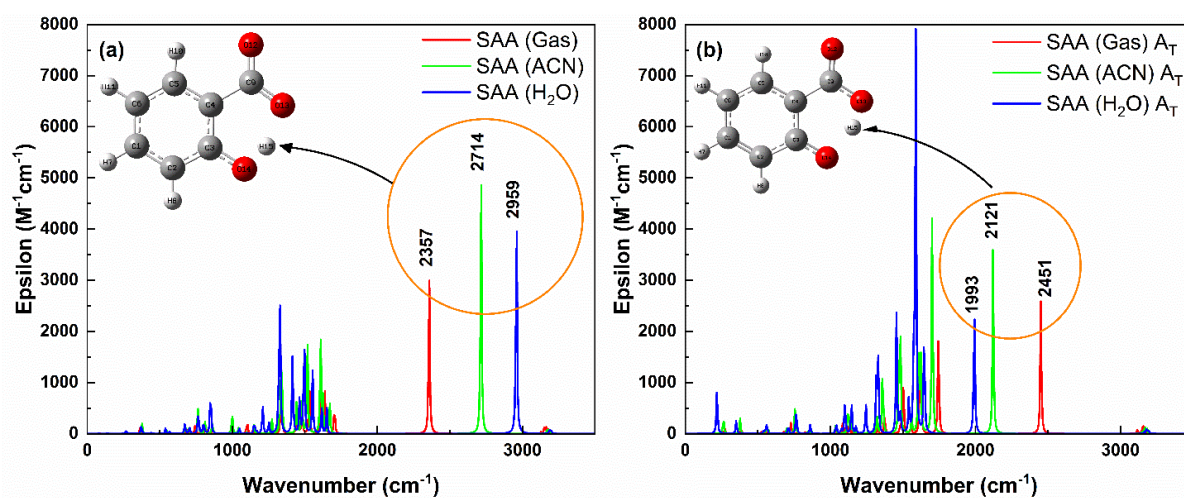

**Fig. S11:** Computational IR spectra of (a) *enol* form and (b) *keto* form of SA anion in the ground state in the implicit environment.

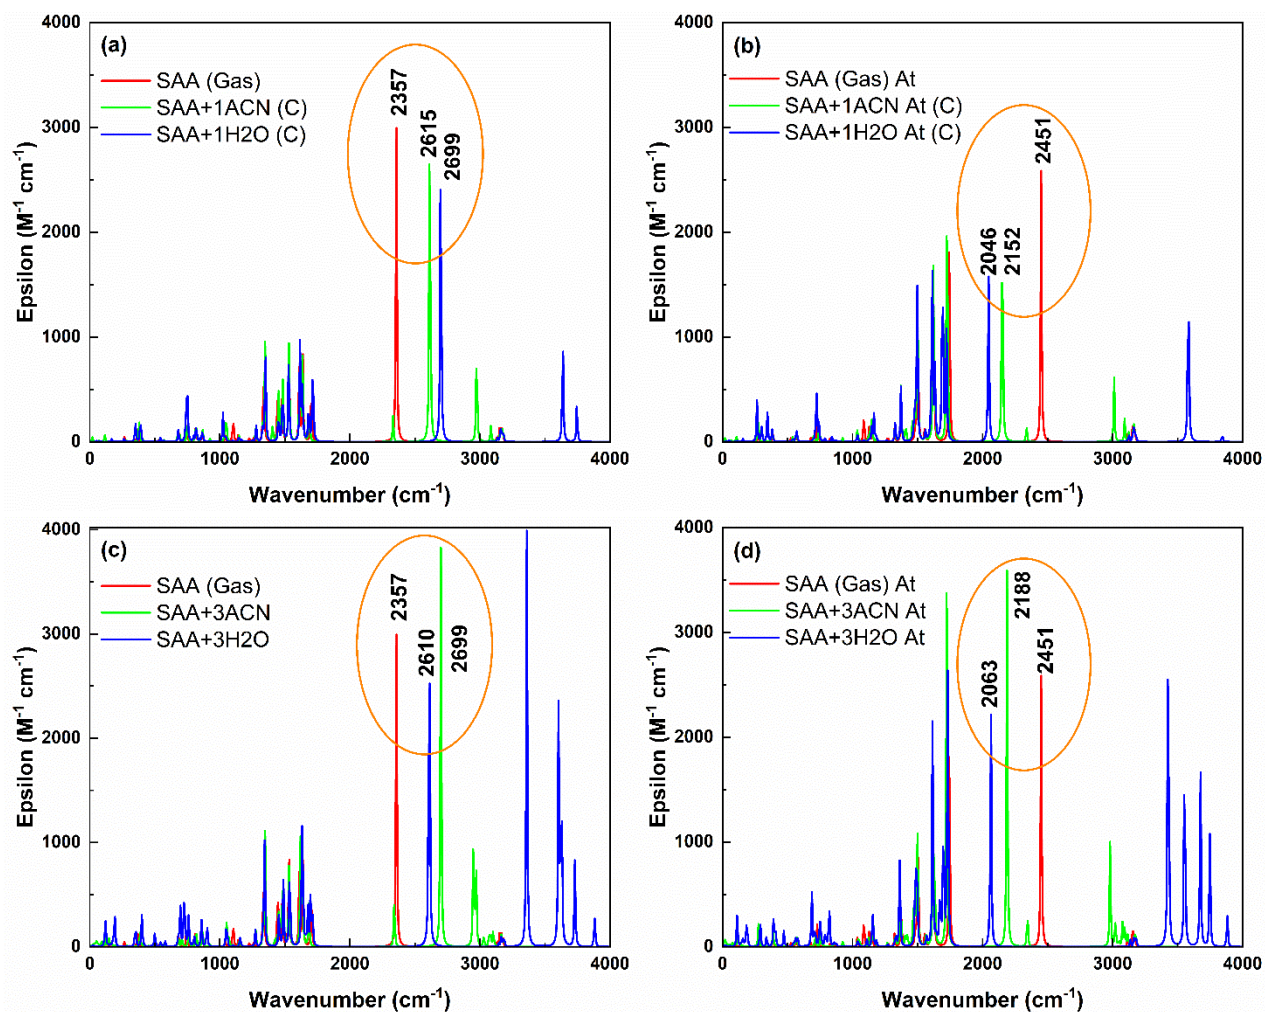

**Fig. S12:** Computational IR spectra of (a) enol form and (b) keto form of SA anion in ground state with one solvent molecule at carboxylate position; (c) enol form and (d) keto form with three solvent molecules.

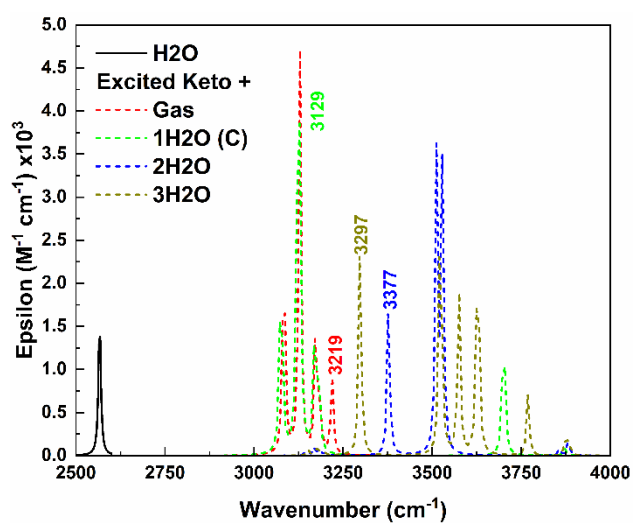

**Fig. S13:** Computational IR spectra of SA anion in excited state with increasing number of water molecule at various positions. Numbered peaks correspond to H-O<sub>a</sub> stretching vibrations.
